# Supplementary material
Source: Springer Nature journal article supplement (https://www.springermedizin.de/resource/supplementary/13033_2014_193_MOESM1_ESM.pdf/9652028)
Supplement: MOESM1 [file 9652028]

Bihar Institute of Health and  
Allied Sciences (BIMHAS)

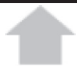

Medical college hospitals  
(MCH)

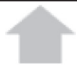

District hospitals (DH)

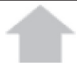

Primary health centres  
(PHC)
